# Supplementary material for: Converting Tobacco Stalk Wastes into Value-Added Products via Sequential Hydrothermal and Pyrolysis Treatments
Source: MDPI journal article supplement (doi:10.3390/agronomy14040801), 2024-04-12
Supplement: s1 [file s1]

## Supplementary Materials

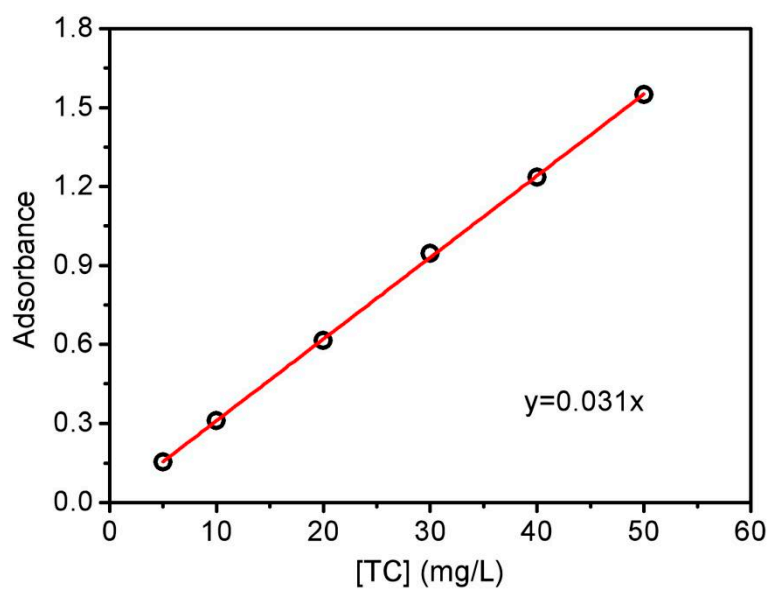

**Figure S1.** The calibration curve of absorbance at 360 nm versus tetracycline concentration [TC] measured in the UV-visible spectrometer.

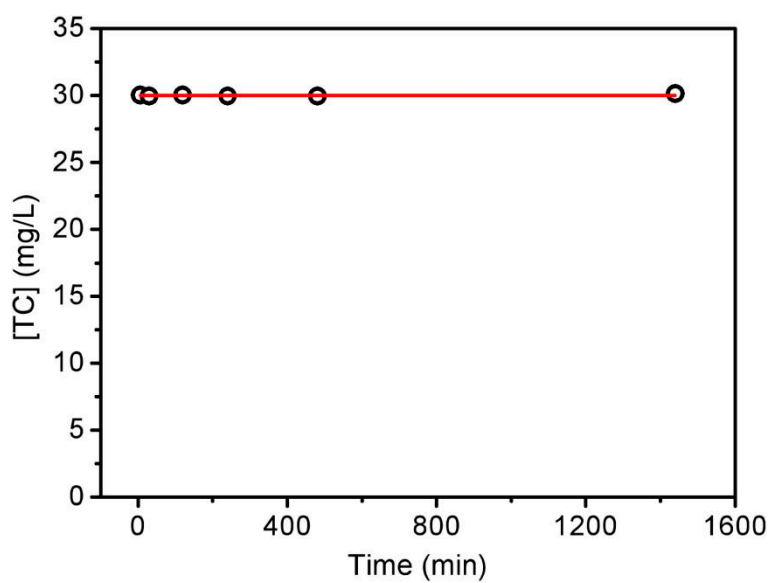

**Figure S2.** The variation of tetracycline concentration [TC] with time by using residual solid (microwave-assisted hydrothermal treated tobacco stalk) as adsorbent.

**Table S1.** The effects of heating temperature (A) and holding time (B) on the carbohydrate yield (mg/g) after extraction from tobacco stalk powder sample.

| Run | A (°C) | B (min) | Y (mg/g) |
|-----|--------|---------|----------|
| 1   | 135    | 20      | 256.71   |
| 2   | 135    | 40      | 245.00   |
| 3   | 135    | 20      | 256.84   |
| 4   | 135    | 20      | 262.95   |
| 5   | 90     | 40      | 210.04   |
| 6   | 135    | 20      | 259.83   |
| 7   | 180    | 20      | 177.60   |
| 8   | 90     | 20      | 217.83   |
| 9   | 135    | 20      | 251.15   |
| 10  | 135    | 0       | 243.85   |
| 11  | 180    | 0       | 143.71   |
| 12  | 180    | 40      | 139.36   |
| 13  | 90     | 0       | 203.20   |

**Table S2.** Analysis of variance and regression coefficients of the response surface model.

| Source                  | Sum of squares | df | Mean square | F value | p-value  |
|-------------------------|----------------|----|-------------|---------|----------|
| Model                   | 22442.52       | 5  | 4488.5      | 87.41   | < 0.0001 |
| A                       | 4839.36        | 1  | 4839.36     | 94.25   | < 0.0001 |
| B                       | 2.21           | 1  | 2.21        | 0.043   | 0.8416   |
| AB                      | 31.3           | 1  | 31.3        | 0.61    | 0.4605   |
| A <sup>2</sup>          | 11626.74       | 1  | 11626.74    | 226.43  | < 0.0001 |
| B <sup>2</sup>          | 912.05         | 1  | 912.05      | 17.76   | 0.004    |
| Residual                | 359.44         | 7  | 51.35       |         |          |
| Lack of Fit             | 282.93         | 3  | 94.31       | 4.93    | 0.0787   |
| Pure Error              | 76.51          | 4  | 19.13       |         |          |
| Cor Total               | 22801.96       | 12 |             |         |          |
| R <sup>2</sup>          | 0.9842         |    |             |         |          |
| Adjusted R <sup>2</sup> | 0.9730         |    |             |         |          |

**Table S3.** The identified benzene products from the pyrolysis of residual solid at different temperature conditions.

| Compound                  | Retention time (min) | Reference retention index | Actual retention index | Peak area<br>(Semiquantitative proportion %) |                   |        |
|---------------------------|----------------------|---------------------------|------------------------|----------------------------------------------|-------------------|--------|
|                           |                      |                           |                        | 700 °C                                       | 500 °C            | 300 °C |
| 1-Ethyl-4-methoxy Benzene | 18.309               | 1237±2                    | 1238                   | 2032961<br>(3.92%)                           | 564219<br>(1.55%) |        |
| 1-Indanone                | 19.469               | 1289±8                    | 1279                   | 940742<br>(1.81%)                            | 432831<br>(1.19%) |        |
| 3-Methylindole            | 22.374               | 1393±6                    | 1386                   | 539088<br>(1.04%)                            |                   |        |

**Table S4.** The identified phenol products from the pyrolysis of residual solid at different temperature conditions.

| Compound                  | Retention time (min) | Reference retention index | Actual retention index | Peak area<br>(Semiquantitative proportion %) |                    |                   |
|---------------------------|----------------------|---------------------------|------------------------|----------------------------------------------|--------------------|-------------------|
|                           |                      |                           |                        | 700 °C                                       | 500 °C             | 300 °C            |
| Phenol                    | 10.421               | 980±4                     | 984                    | 2494376<br>(4.81%)                           | 1869113<br>(5.15%) | 396689<br>(3.16%) |
| 2-Methyl-Phenol           | 12.746               | 1054±9                    | 1056                   | 1416010<br>(2.73%)                           | 716961<br>(1.97%)  |                   |
| 4-Methyl-Phenol           | 13.465               | 1075±5                    | 1078                   | 3646671<br>(7.03%)                           | 1542043<br>(4.25%) | 185175<br>(1.48%) |
| Guaiacol                  | 13.707               | 1090±3                    | 1086                   | 974556<br>(1.88%)                            | 723319<br>(1.99%)  |                   |
| 2,6-Dimethyl-Phenol       | 14.389               | 1108±4                    | 1107                   | 452022<br>(0.87%)                            |                    |                   |
| 2-Ethyl-Phenol            | 15.356               | 1139±3                    | 1139                   | 646091<br>(1.24%)                            |                    |                   |
| 2,4-Dimethyl-Phenol       | 15.705               | 1150±2                    | 1150                   | 1229474<br>(2.37%)                           | 436417<br>(1.20%)  |                   |
| 4-Ethyl-Phenol            | 16.258               | 1169±3                    | 1168                   | 3377339<br>(6.51%)                           | 1447536<br>(3.99%) |                   |
| 3,5-Dimethyl-Phenol       | 16.542               | 1171±4                    | 1178                   | 695000<br>(1.34%)                            |                    |                   |
| 2-Methoxy-4-methyl-Phenol | 16.891               | 1193±3                    | 1189                   | 570816<br>(1.10%)                            | 649384<br>(1.79%)  |                   |

**Table S4.** continued. The identified phenol products from the pyrolysis of residual solid at different temperature conditions.

| Compound                       | Retention time (min) | Reference retention index | Actual retention index | Peak area<br>(Semiquantitative proportion %) |                   |                   |
|--------------------------------|----------------------|---------------------------|------------------------|----------------------------------------------|-------------------|-------------------|
|                                |                      |                           |                        | 700 °C                                       | 500 °C            | 300 °C            |
| 3,4-Dimethyl-Phenol            | 17.069               | 1193±4                    | 1195                   | 407569<br>(0.79%)                            |                   |                   |
| 4-Ethyl-2-methyl-Phenol        | 18.959               | 1236±17                   | 1261                   | 798461<br>(1.54%)                            |                   |                   |
| 2,4,5-Trimethyl-Phenol         | 19.179               | 1276±1                    | 1268                   | 249511<br>(0.48%)                            |                   |                   |
| 4-Ethyl-Guaiacol               | 19.319               | 1282±4                    | 1273                   | 656387<br>(1.26%)                            | 454233<br>(1.25%) |                   |
| 4-Hydroxy-3-methylacetophenone | 20.360               | 1323                      | 1310                   | 1501069<br>(2.89%)                           | 730592<br>(2.01%) |                   |
| 2-Methoxy-4-propenyl-Phenol    | 23.964               | 1450±14                   | 1448                   | 717909<br>(1.38%)                            | 544100<br>(1.50%) | 136809<br>(1.09%) |
| 2,4-Di-tert-butyl-Phenol       | 25.446               | 1511±13                   | 1507                   | 513661<br>(0.99%)                            | 198657<br>(0.55%) | 137372<br>(1.09%) |

**Table S5.** The identified heterocycle products from the pyrolysis of residual solid at different temperature conditions.

| Compound                                | Retention time (min) | Reference retention index | Actual retention index | Peak area<br>(Semiquantitative proportion %) |                     |                     |
|-----------------------------------------|----------------------|---------------------------|------------------------|----------------------------------------------|---------------------|---------------------|
|                                         |                      |                           |                        | 700 °C                                       | 500 °C              | 300 °C              |
| Methyl 2-furoate                        | 10.136               | 979±4                     | 976                    | 622292<br>(1.20%)                            | 924401<br>(2.55%)   |                     |
| 1,4:3,6-Dianhydro-alpha-d-glucopyranose | 17.611               | 1207±8                    | 1214                   | 1831919<br>(3.53%)                           | 2217289<br>(6.11%)  | 2302681<br>(18.35%) |
| Nicotine                                | 21.322               | 1361                      | 1346                   | 7654004<br>(14.75%)                          | 3773591<br>(10.39%) | 2363332<br>(18.84%) |

**Table S6.** The identified alkane products from the pyrolysis of residual solid at different temperature conditions.

| Compound    | Retention time (min) | Reference retention index | Actual retention index | Peak area<br>(Semiquantitative proportion %) |                    |                     |
|-------------|----------------------|---------------------------|------------------------|----------------------------------------------|--------------------|---------------------|
|             |                      |                           |                        | 700 °C                                       | 500 °C             | 300 °C              |
| Pentadecane | 25.252               | 1500                      | 1499                   | 222039<br>(0.43%)                            |                    |                     |
| Eicosane    | 36.025               | 2000                      | 2000                   | 541575<br>(1.04%)                            |                    |                     |
| Docosane    | 39.665               | 2200                      | 2199                   | 637473<br>(1.23%)                            |                    |                     |
| Heptacosane | 47.608               | 2700                      | 2699                   | 2986183<br>(5.75%)                           | 3063785<br>(8.44%) | 1485679<br>(11.84%) |
| Nonacosane  | 50.400               | 2900                      | 2899                   | 1815935<br>(3.50%)                           | 1728816<br>(4.76%) |                     |

**Table S7.** The identified alkene products from the pyrolysis of residual solid at different temperature conditions.

| Compound                               | Retention time (min) | Reference retention index | Actual retention index | Peak area<br>(Semiquantitative proportion %) |                     |                     |
|----------------------------------------|----------------------|---------------------------|------------------------|----------------------------------------------|---------------------|---------------------|
|                                        |                      |                           |                        | 700 °C                                       | 500 °C              | 300 °C              |
| 2-Methyl-2-cyclopenten-1-one           | 7.902                | 913±8                     | 907                    | 238251<br>(0.46%)                            |                     |                     |
| 2-Hydroxy-2-cyclopenten-1-one          | 8.509                | 926±1                     | 926                    | 1226116<br>(2.36%)                           | 4088321<br>(11.26%) |                     |
| 2-Hydroxy-3-methyl-2-cyclopenten-1-one | 11.752               | 1034±4                    | 1025                   | 3394486<br>(6.54%)                           | 3002752<br>(8.27%)  | 1666973<br>(13.29%) |
| 2,3-Dimethyl-2-cyclopenten-1-one       | 12.080               | 1040±5                    | 1035                   | 776345<br>(1.50%)                            | 696783<br>(1.92%)   | 129034<br>(1.03%)   |
| 3-Ethyl-2-hydroxy-2-cyclopenten-1-one  | 14.652               | 1091±17                   | 1116                   | 1067814<br>(2.06%)                           | 807008<br>(2.22%)   | 415401<br>(3.31%)   |
| Neophytadiene                          | 32.770               | 1837±5                    | 1836                   | 840114<br>(1.62%)                            | 650077<br>(1.79%)   | 399753<br>(3.19%)   |

**Table S8.** The identified other products from the pyrolysis of residual solid at different temperature conditions.

| Compound                     | Retention time (min) | Reference retention index | Actual retention index | Peak area<br>(Semiquantitative proportion %) |                    |                    |
|------------------------------|----------------------|---------------------------|------------------------|----------------------------------------------|--------------------|--------------------|
|                              |                      |                           |                        | 700 °C                                       | 500 °C             | 300 °C             |
| Methyl palmitate             | 34.569               | 1926±2                    | 1925                   | 745352<br>(1.44%)                            | 559340<br>(1.54%)  | 264174<br>(2.11%)  |
| 2,7,11-Cembratriene-4,6-diol | 37.136               | 2073±21                   | 2059                   | 1305582<br>(2.52%)                           | 1058180<br>(2.91%) | 869228<br>(6.93%)  |
| 9-Octadecenamide             | 42.361               | 2334                      | 2359                   | 2133699<br>(4.11%)                           | 3422932<br>(9.43%) | 1794278<br>(14.3%) |

**Table S9.** The tetracycline adsorption ( $Q_t$ ) at predetermined time point on the obtained biochar at different pyrolysis temperature.

| Run | Tetracycline<br>(mg/L) | Pyrolysis<br>Temperature | Time<br>(min) | $Q_t$<br>(mg/g)    |
|-----|------------------------|--------------------------|---------------|--------------------|
| 1   | 30                     | 300 °C                   | 5             | $3.607 \pm 0.669$  |
| 2   | 30                     | 300 °C                   | 30            | $4.686 \pm 0.554$  |
| 3   | 30                     | 300 °C                   | 120           | $6.120 \pm 0.467$  |
| 4   | 30                     | 300 °C                   | 240           | $7.882 \pm 0.594$  |
| 5   | 30                     | 300 °C                   | 480           | $8.884 \pm 0.441$  |
| 6   | 30                     | 300 °C                   | 1440          | $10.047 \pm 0.282$ |
| 7   | 30                     | 500 °C                   | 5             | $8.764 \pm 0.701$  |
| 8   | 30                     | 500 °C                   | 30            | $14.573 \pm 1.355$ |
| 9   | 30                     | 500 °C                   | 120           | $16.450 \pm 1.535$ |
| 10  | 30                     | 500 °C                   | 240           | $18.002 \pm 0.602$ |
| 11  | 30                     | 500 °C                   | 480           | $18.880 \pm 0.273$ |
| 12  | 30                     | 500 °C                   | 1440          | $19.005 \pm 1.412$ |
| 13  | 30                     | 700 °C                   | 5             | $5.584 \pm 0.860$  |
| 14  | 30                     | 700 °C                   | 30            | $7.346 \pm 0.769$  |
| 15  | 30                     | 700 °C                   | 120           | $9.924 \pm 0.918$  |
| 16  | 30                     | 700 °C                   | 240           | $11.121 \pm 0.525$ |
| 17  | 30                     | 700 °C                   | 480           | $12.117 \pm 0.796$ |
| 18  | 30                     | 700 °C                   | 1440          | $12.595 \pm 1.384$ |
| 19  | 10                     | 500 °C                   | 480           | $7.746 \pm 0.282$  |
| 20  | 20                     | 500 °C                   | 480           | $12.994 \pm 1.174$ |
| 21  | 40                     | 500 °C                   | 480           | $25.265 \pm 0.435$ |
| 22  | 50                     | 500 °C                   | 480           | $28.707 \pm 1.087$ |

**Table S10.** Kinetic parameters of tetracycline adsorption on the biochar obtained at different pyrolysis temperature using pseudo-first order and pseudo-second order models.

| Models                                                        | Pyrolysis Temperature | Parameters       |         |
|---------------------------------------------------------------|-----------------------|------------------|---------|
| Pseudo-first order:<br>$Q_t = Q_e(1 - \exp(-k_1 t))$          | 300 °C                | $Q_e$ (mg/g)     | 8.316   |
|                                                               |                       | $k_1$ (1/min)    | 0.0317  |
|                                                               |                       | $R^2$            | 0.775   |
|                                                               | 500 °C                | $Q_e$ (mg/g)     | 17.547  |
|                                                               |                       | $k_1$ (1/min)    | 0.1231  |
|                                                               |                       | $R^2$            | 0.950   |
|                                                               | 700 °C                | $Q_e$ (mg/g)     | 11.205  |
|                                                               |                       | $k_1$ (1/min)    | 0.0594  |
|                                                               |                       | $R^2$            | 0.845   |
| Pseudo-second order:<br>$Q_t = Q_e^2 k_2 t / (1 + Q_e k_2 t)$ | 300 °C                | $Q_e$ (mg/g)     | 9.029   |
|                                                               |                       | $k_2$ (g/mg/min) | 0.00477 |
|                                                               |                       | $R^2$            | 0.869   |
|                                                               | 500 °C                | $Q_e$ (mg/g)     | 18.436  |
|                                                               |                       | $k_2$ (g/mg/min) | 0.00871 |
|                                                               |                       | $R^2$            | 0.988   |
|                                                               | 700 °C                | $Q_e$ (mg/g)     | 11.655  |
|                                                               |                       | $k_2$ (g/mg/min) | 0.00946 |
|                                                               |                       | $R^2$            | 0.931   |

**Table S11.** Kinetic parameters of tetracycline adsorption on the biochar obtained at different pyrolysis temperature using intraparticle diffusion and Chrastil's diffusion models.

| Models                                                       | Pyrolysis Temperature | Parameters                          |        |
|--------------------------------------------------------------|-----------------------|-------------------------------------|--------|
| Intraparticle diffusion:<br>$Q_t = k_{id}t^{0.5} + C_d$      | 300 °C                | $k_{i1}$ (mg/g/min <sup>0.5</sup> ) | 1.613  |
|                                                              |                       | $C_1$ (mg/g)                        | 0      |
|                                                              |                       | $R^2$                               | 1      |
|                                                              |                       | $k_{i2}$ (mg/g/min <sup>0.5</sup> ) | 0.317  |
|                                                              |                       | $C_2$ (mg/g)                        | 2.854  |
|                                                              |                       | $R^2$                               | 0.974  |
|                                                              | 500 °C                | $k_{i1}$ (mg/g/min <sup>0.5</sup> ) | 3.920  |
|                                                              |                       | $C_1$ (mg/g)                        | 0      |
|                                                              |                       | $R^2$                               | 1      |
|                                                              |                       | $k_{i2}$ (mg/g/min <sup>0.5</sup> ) | 0.342  |
|                                                              |                       | $C_2$ (mg/g)                        | 12.698 |
|                                                              |                       | $R^2$                               | 1      |
|                                                              | 700 °C                | $k_{i1}$ (mg/g/min <sup>0.5</sup> ) | 2.498  |
|                                                              |                       | $C_1$ (mg/g)                        | 0      |
|                                                              |                       | $R^2$                               | 1      |
|                                                              |                       | $k_{i2}$ (mg/g/min <sup>0.5</sup> ) | 0.380  |
|                                                              |                       | $C_2$ (mg/g)                        | 5.418  |
|                                                              |                       | $R^2$                               | 0.953  |
| Chrastil's diffusion:<br>$Q_t = Q_e(1 - \exp(-k_c A_0 t))^x$ | 300 °C                | $Q_e$ (mg/g)                        | 10.758 |
|                                                              |                       | $k_c$ (L/g/min)                     | 0.002  |
|                                                              |                       | $x$                                 | 0.224  |
|                                                              |                       | $R^2$                               | 0.989  |
|                                                              | 500 °C                | $Q_e$ (mg/g)                        | 18.785 |
|                                                              |                       | $k_c$ (L/g/min)                     | 0.018  |
|                                                              |                       | $x$                                 | 0.226  |
|                                                              |                       | $R^2$                               | 0.991  |
|                                                              | 700 °C                | $Q_e$ (mg/g)                        | 12.710 |
|                                                              |                       | $k_c$ (L/g/min)                     | 0.006  |
|                                                              |                       | $x$                                 | 0.204  |
|                                                              |                       | $R^2$                               | 0.998  |



**Table S12.** Isotherm parameters of tetracycline adsorption on the biochar obtained at different pyrolysis temperature using Langmuir, Freundlich and Sips models.

| Models                                                         | Pyrolysis Temperature | Parameters                                    |         |
|----------------------------------------------------------------|-----------------------|-----------------------------------------------|---------|
| Langmuir:<br>$Q_e = K_L C_e Q_m / (1 + K_L C_e)$               | 500 °C                | $Q_m$ (mg/g)                                  | 90.094  |
|                                                                |                       | $K_L$ (L/mg)                                  | 0.0134  |
|                                                                |                       | $R^2$                                         | 0.985   |
| Freundlich:<br>$Q_e = K_F C_e^{1/n}$                           | 500 °C                | $K_F$ (mg <sup>(1-n)</sup> L <sup>n</sup> /g) | 1.802   |
|                                                                |                       | $n$                                           | 1.280   |
|                                                                |                       | $R^2$                                         | 0.986   |
| Sips:<br>$Q_e = (Q_m K_S C_e^{(1/y)}) / (1 + K_S C_e^{(1/y)})$ | 500 °C                | $Q_m$ (mg/g)                                  | 186.879 |
|                                                                |                       | $K_S$ (L/mg)                                  | 0.0083  |
|                                                                |                       | $y$                                           | 1.149   |
|                                                                |                       | $R^2$                                         | 0.980   |

**Table S13.** Comparison of the maximum adsorption capacity and other parameters of some previously reported biochar from different biomass for removal of tetracycline.

| Adsorbent                                          | Pyrolysis Temperature | pH            | Adsorption Temperature | Maximum adsorption capacity | References           |
|----------------------------------------------------|-----------------------|---------------|------------------------|-----------------------------|----------------------|
| Biochar from sludge with no additive               | 750 °C                | 6.0           | 25 °C                  | 13.9 mg/g                   | Yang et al. (2016)   |
| Biochar from sludge activated by ferric            | 750 °C                | 6.0           | 25 °C                  | 54.5 mg/g                   | Yang et al. (2016)   |
| Biochar from rice straw with no additive           | 400 °C<br>600 °C      | 5.0           | 25 °C                  | 8.2 mg/g<br>14.2 mg/g       | Wang et al. (2018)   |
| Biochar from swine manure with no additive         | 400 °C<br>600 °C      | 5.0           | 25 °C                  | 6.5 mg/g<br>8.1 mg/g        | Wang et al. (2018)   |
| Biochar from spent coffee ground with no additive  | 500 °C                | 7.0           | 25 °C                  | 39.2 mg/g                   | Nguyen et al. (2021) |
| Biochar from spent coffee ground activated by NaOH | 500 °C                | 7.0           | 25 °C                  | 113.6 mg/g                  | Nguyen et al. (2021) |
| Biochar from peanut shell with no additive         | 400 °C<br>700 °C      | Not mentioned | 25 °C                  | 26.4 mg/g<br>33.4 mg/g      | Shi et al. (2023)    |
| Biochar from tobacco stalk waste with no additive  | 500 °C                | 7.0           | 25 °C                  | 90.1 mg/g                   | This work            |

## References

1. Nguyen et al., *J. Water Process Eng.* 2021, 40, 101908
2. Wang et al., *RSC Adv.* 2018, 8, 16260-16268
3. Yang et al., *Bioresour. Technol.* 2016, 211, 566-573
4. Shi et al., *Sustainability* 2023, 15, 874.
